# Supplementary material for: Identification of Targetable Lesions in Anaplastic Thyroid Cancer by Genome Profiling
Source: MDPI journal article supplement (doi:10.3390/cancers11030402), 2019-03-22

## Supplementary Materials: Identification of Targetable Lesions in Anaplastic Thyroid Cancer by Genome Profiling

Naveen Ravi, Minjun Yang, Sigurdur Gretarsson, Caroline Jansson, Nektaria Mylona, Saskia R. Sydow, Eleanor L. Woodward, Lars Ekblad, Johan Wennerberg and Kajsa Paulsson

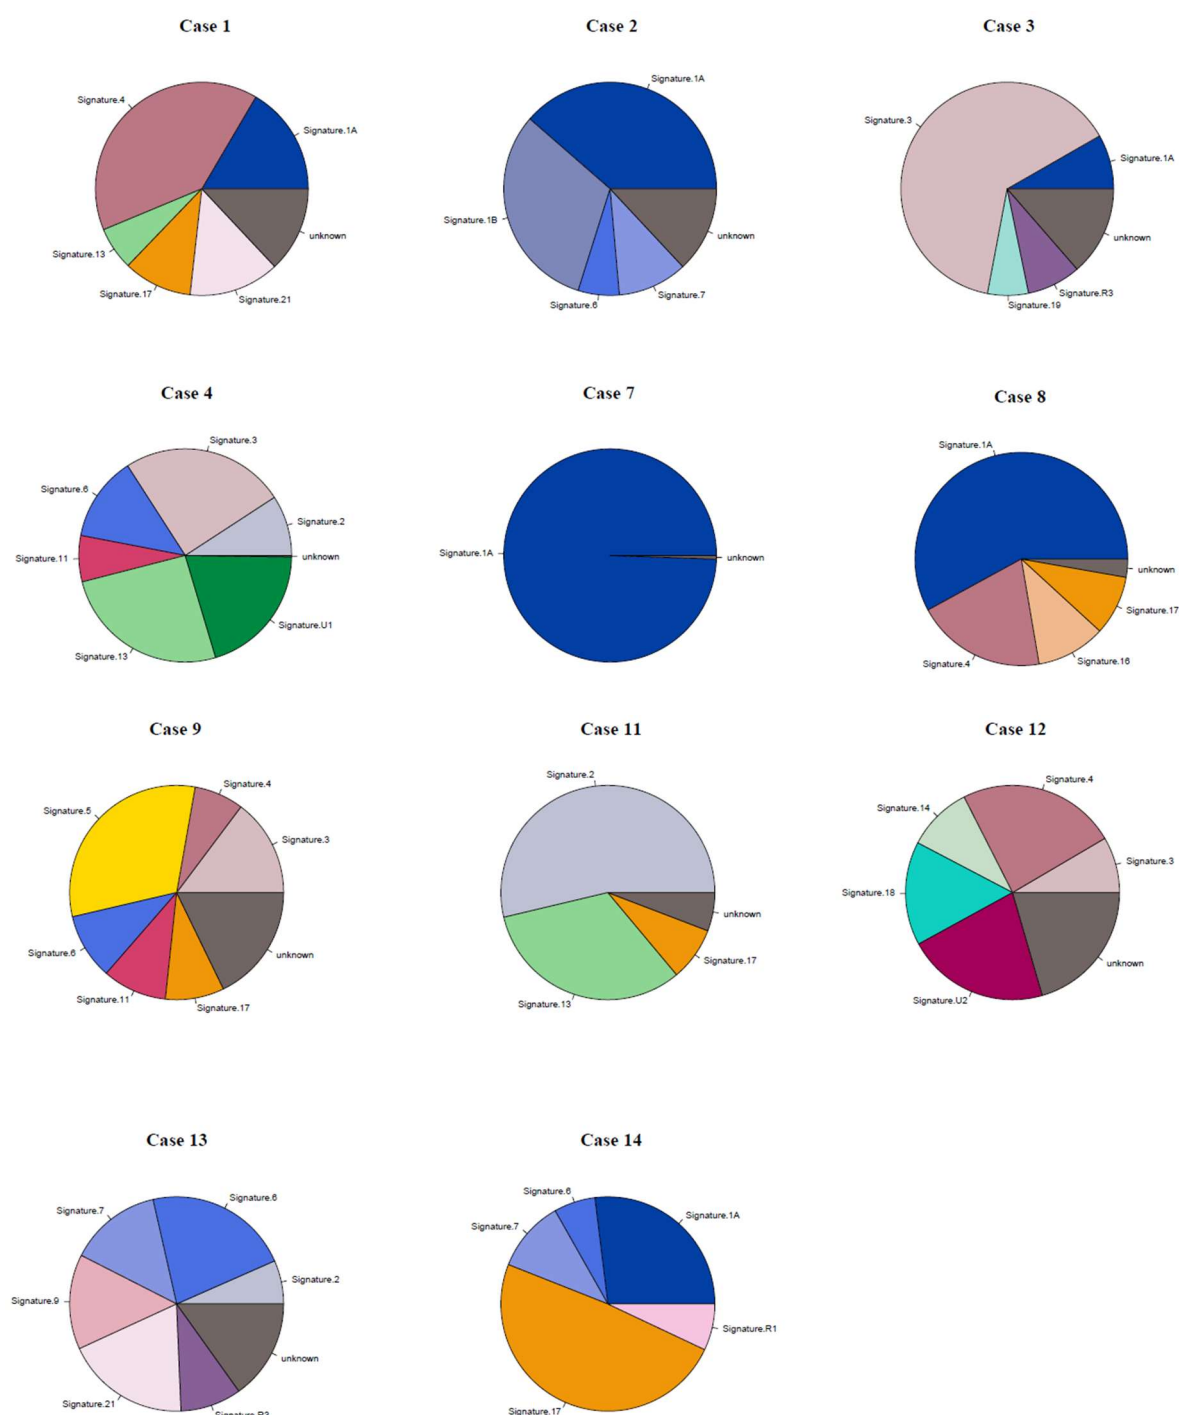

**Figure S1.** Mutation signatures of 11 primary anaplastic thyroid cancer cases, showing heterogeneity in the involved mutational processes.

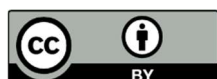

Supplement: s1 [file s1]
